# Supplementary material
Source: publisher figshare collection journal article supplement (https://asha.figshare.com/articles/dataset/_/13345187)
Supplement: Supplementary file 2 [file 1]

**Supplemental Material S1.** Codebook of child-parent-provider locations and activities.

| <b>Code</b> | <b>Location</b>       |
|-------------|-----------------------|
| 1           | Patient's room        |
| 2           | Hallway               |
| 3           | Procedure room        |
| 4           | Dining room/cafeteria |
| 5           | Gym                   |
| 6           | Day room (play room)  |
| 7           | Outside               |
| 8           | Feeding room          |

| <b>Code</b> | <b>Activities</b>                                                                                                                                                  |
|-------------|--------------------------------------------------------------------------------------------------------------------------------------------------------------------|
| 1           | Administering medication/formula (through NG tube or by mouth)                                                                                                     |
| 2           | Rounding and/or parent education activities (checking diaper, checking in with the family about day, how the child is feeling, asking if they need anything, etc.) |
| 3           | Taking vitals (taking the child's temperature, blood pressure, and/or oxygenation)                                                                                 |
| 4           | Placing/replacing/removing an NG or G tube                                                                                                                         |
| 5           | Measuring the child's height/weight                                                                                                                                |
| 6           | Respiratory treatment, trach/vent check, suctioning                                                                                                                |
| 7           | Transferring the child to/from bed/wheelchair and/or assisting/supervising the child walking on unit                                                               |
| 8           | Repositioning the child in bed/wheelchair                                                                                                                          |
| 10          | Meal time: breakfast, lunch, dinner; Feeding session that does not occur during scheduled meal time                                                                |
| 11          | Physical therapy session                                                                                                                                           |
| 12          | Occupational therapy session – does not involve feeding                                                                                                            |
| 13          | Speech therapy session – does not involve feeding                                                                                                                  |
| 14          | Recreational therapy session – scheduled therapy session                                                                                                           |
| 15          | Unstructured, child-led play – not during a scheduled therapy session (e.g., playing with rehabilitation assistant)                                                |
